# Supplementary material
Source: bioRxiv or medRxiv preprint supplement (https://www.biorxiv.org/highwire/filestream/19628/field_highwire_adjunct_files/0/070789-1.pdf)
Supplement: Supplementary file [file 070789-1.pdf]

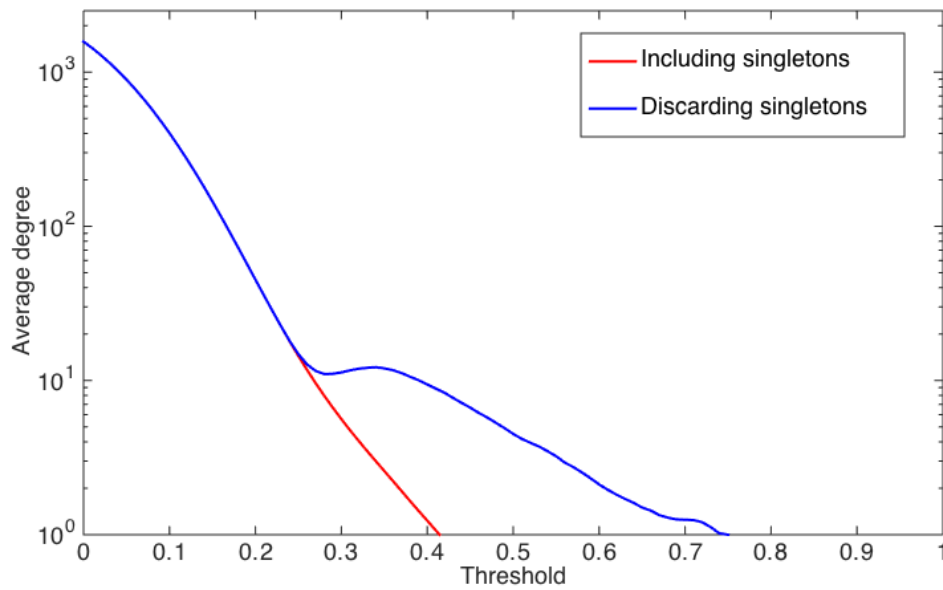

**Supplemental Figure 1: Comparison of average degree as a function of threshold.** When singleton nodes (nodes of degree zero) are maintained in the network, we see the pattern in the red line, as nodes with degree zero contribute to lowering the average degree. When singleton nodes are discarded, we see the blue line where the average degree is inflated. In the main text, the blue line, with singleton nodes removed, is reported.
